# Supplementary material for: Physical characteristics of elite youth male football players aged 13–15 are based upon biological maturity
Source: PeerJ. 2022 May 5;10:e13282. doi: 10.7717/peerj.13282 (PMC9080430; doi:10.7717/peerj.13282)
Supplement: Supplemental Information 1 [file peerj-10-13282-s001.xlsx]

## Sheet: Sheet1
serial number	CA	CA group	SA	SA-CA	SA group	height	body mass	C thigh	%Fat	5*25RSA	Left T	Right T	SLJ	10m	30m	YYIR1
1-1	13.1	1	10.58	-2.52	2	150	45	42.1	8.58	38.31	9.47	9.48	182.6	2.33	5.47	1900
1-2	13.4	1	12.32	-1.08	2	162	55	48.3	10.17	37.9	9.27	9.31	188.9	2.15	5.11	1700
1-3	13.4	1	12.32	-1.08	2	162	50	50	11.82	36.47	9.01	9.05	198.1	2.17	5.16	2160
1-4	13.6	1	12.78	-0.82	1	160.6	43.4	49.2	11	35.86	9.01	8.81	194	1.93	4.77	1540
1-5	12.9	1	12.78	-0.12	1	164	47.8	51.3	12.01	36.44	9.27	9.25	205.4	2.08	4.96	1880
1-6	13.6	1	12.78	-0.82	1	160.6	43.4	42	10.88	35.88	8.77	8.8	194.3	1.9	4.75	1100
1-7	13.1	1	12.78	-0.32	1	164	48	49.99	11.1	36.41	9.21	9.23	204.6	2.18	5.04	1980
1-8	13	1	12.9	-0.1	1	165	50	49.99	13.08	37.16	9.37	9.39	207.8	1.98	4.88	2160
1-9	13	1	13	0	1	159.6	53.8	43	15.39	37.79	8.97	8.99	191	1.68	4.7	1880
1-10	13	1	13	0	1	159	53.7	52.6	15.09	37.79	8.97	8.99	190.7	1.66	4.68	1840
1-11	13.9	1	13.1	-0.8	1	166.07	52.64	47.7	11.71	34.62	8.97	9.01	225	1.75	4.4	2140
1-12	13.1	1	11.18	-1.92	2	153.1	40.1	41.4	12.2	37.71	9.47	9.48	181	2.03	5.23	1880
1-13	13.1	1	13.1	0	1	164.8	50	43	13.08	37.16	9.37	9.41	207.1	1.98	4.88	2160
1-14	13	1	13.1	0.1	1	159.1	53.9	47.7	15.39	37.71	8.93	9	191.3	1.68	4.72	1800
1-15	13.9	1	13.1	-0.8	1	166.07	52.64	49.99	11.71	34.65	8.97	9	225	1.75	4.38	2160
1-16	13.8	1	13.1	-0.7	1	165.5	47.6	44	9.24	34.89	8.07	8.09	220.4	2.32	5.11	1920
1-17	13.8	1	13.13	-0.67	1	165.5	47.8	50	9.26	35.89	8.07	8.09	221	2.32	5.11	1600
1-18	13.8	1	13.13	-0.67	1	165.5	48.6	44	9.25	35.82	8.07	8.11	220	2.32	5.11	1580
1-19	13.1	1	13.28	0.18	1	162	45	46.5	11.27	36.57	9.35	9.39	197.8	1.88	4.66	1720
1-20	13.1	1	13.28	0.18	1	162	45	49.99	11.27	36.57	9.35	9.37	198.3	1.85	4.64	2160
1-21	13.8	1	13.35	-0.45	1	157.2	51.8	53.4	14.35	35.74	8.57	8.59	201	2.14	5.2	1600
1-22	13.8	1	13.35	-0.45	1	157.2	51.1	52	14.35	35.7	8.6	8.61	201.2	2.14	5.2	1720
1-23	13	1	11.5	-1.5	2	157.9	45	41.3	14.62	38.54	9.23	9.24	194.1	2.04	5.12	2020
1-24	13.8	1	13.4	-0.4	1	157.3	51.3	48.8	14.35	35.74	8.61	8.59	201.4	2.14	5.2	1920
1-25	13	1	13.7	0.7	1	164.2	52.4	46.5	11.32	36.48	8.67	8.69	196	1.85	4.68	1600
1-26	13	1	13.7	0.7	1	164	52.4	48	11.3	36.5	8.63	8.7		1.84	4.7	1580
1-27	13.2	1	13.7	0.5	1	164.5	52.8	48.2	12.3	36.36	8.56	8.68	198.2	1.8	4.63	1880
1-28	13.8	1	13.85	0.05	1	166.1	49.5	50	12.2	36.84	9.37	9.39	194	2.13	5.04	2100
1-29	13.8	1	13.85	0.05	1	175	66.3	52	11.76	35.45	8.43	8.47	240	1.86	4.55	1820
1-30	13.8	1	13.9	0.1	1	166	49.5	45.2	12.2	36.84	9.37	9.39	194.1	2.13	5.04	1840
1-31	13.8	1	13.95	0.15	1	166	50.3	46.1	11.98	35.89	9.26	9.39	194.2	2.03	5.02	2060
1-32	13.8	1	14.1	0.3	1	175	65.9	52.8	12.03	35.62	8.44	8.46	238.8	1.9	4.57	2160
1-33	13.8	1	14.13	0.33	1	172.5	54.1	49.2	10.56	35.29	8.07	8.11	235	1.88	4.5	1540
1-34	13.2	1	11.67	-1.53	2	170	50	41.8	13.85	39.72	9.77	9.78	190.8	1.95	4.97	1900
1-35	13.8	1	14.13	0.33	1	172.5	54.1	50.1	10.56	35.29	8.07	8.1	235	1.88	4.5	2160
1-36	13.8	1	14.15	0.35	1	157.3	51.8	51.3	15.45	36.63	8.57	8.59	227	1.8	4.47	1820
1-37	13.8	1	14.15	0.35	1	157.5	52	52.1	14.69	36.1	8.6	8.61	227.6	1.82	4.45	2060
1-38	13.8	1	14.2	0.4	1	157.8	51.8	55.3	14.81	36.63	8.57	8.51	227.1	1.79	4.44	2180
1-39	13.9	1	14.5	0.6	1	165	46.1	50.1	10.1	34.51	8.15	8.17	226.3	1.74	4.36	2100
1-40	13.6	1	14.78	1.18	3	175.1	48	49.99	11.1	37.19	8.67	8.69	218	2.15	4.78	1940
1-41	13.6	1	14.88	1.28	3	174.8	48.2	47	11.32	37.21	8.69	8.71	217.8	2.1	4.75	1820
1-42	13.8	1	14.93	1.13	3	174	56.7	48.3	11.01	35.02	8.26	8.3	209.1	1.81	4.46	1900
1-43	13.9	1	15	1.1	3	168	47	49.99	11.43	35.12	8.97	9	220.6	1.76	4.28	2220
1-44	13.8	1	15.04	1.24	3	174.5	61.8	53.1	10.34	35.11	8.07	8.09	236	1.77	4.35	1820
1-45	13.1	1	11.8	-1.3	2	153.3	40.6	42.1	12.2	37.71	9.47	9.48	181	2.03	5.23	1640
1-46	13.8	1	15.1	1.3	3	174	57.2	47	10.99	34.59	8.26	8.28	208.7	1.77	4.45	1880
1-47	13.9	1	15.1	1.2	3	168.2	47	48.41	11.43	35.12	8.97	9.01	220	1.76	4.28	1700
1-48	13.8	1	15.1	1.3	3	174	57.2	50	10.99	34.59	8.26	8.28	209	1.77	4.45	2200
1-49	13.8	1	15.23	1.43	3	174.2	61.2	50.2	12.09	33.73	9.07	9.08	236	2.02	4.47	1860
1-50	13.8	1	15.25	1.45	3	174.5	61.8	47	10.34	35.11	8.07	8.09	236	1.77	4.35	1600
1-51	13.8	1	15.25	1.45	3	174.5	61.8	53.1	10.34	35.1	8.07	8.1	235.8	1.76	4.36	2180
1-52	13.6	1	15.28	1.68	3	179.1	62.8	44	15.01	35.5	8.67	8.71	212	1.81	4.59	2100
1-53	13.6	1	15.28	1.68	3	179	62.2	60.1	15.01	35.5	8.67	8.7	212	1.81	4.59	2180
1-54	13.8	1	15.3	1.5	3	165.2	45.3	53.4	9.9	34.49	8.14	8.19	226.2	1.74	4.38	2160
1-55	13.8	1	15.33	1.53	3	175	55	50.2	10.94	35.9	8.51	8.52	221	1.85	4.65	1880
1-56	13.4	1	12.12	-1.28	2	162	50	49.99	11.82	36.47	9.01	9.03	198.2	2.27	5.21	2100
1-57	13.4	1	12.22	-1.18	2	162	55	49.99	10.17	37.9	9.27	9.3	188.8	2.15	5.11	1280
1-58	13.3	1	12.25	-1.05	2	165	44	41.4	10.45	35.79	8.62	8.63	212	2.13	4.91	1560
1-59	13.6	1	12.28	-1.32	2	158.2	42.3	42.4	16.27	38.85	8.44	8.45	189.9	1.92	4.86	1840
2-1	14.3	2	14.15	-0.15	1	176	50	50.3	11.82	37.23	8.87	8.91	240	1.62	4.21	1600
2-2	14	2	14.1	0.1	1	177	64	48.8	12.75	33.16	8.43	8.46	251	1.65	4.14	2140
2-3	14.5	2	14	-0.5	1	167	45.8	60.1	8.91	34.4	8.01	8.05	226.2	1.68	4.48	2020
2-4	14.5	2	14.2	-0.3	1	166.8	46.8	49.6	9.91	34.4	8.08	8.04	225.8	1.68	4.48	2020
2-5	14.3	2	13.55	-0.75	1	170	58.2	51.4	12.03	35.38	8.4	8.54	229.4	1.68	4.44	2100
2-6	14.3	2	14.25	-0.05	1	165.5	50.9	52.6	10.67	33.81	8.17	8.18	223	1.69	4.36	2200
2-7	14.9	2	14.32	-0.58	1	177	57.9	49.99	11.1	33.03	8.18	8.2	230.8	1.69	4.41	2160
2-8	14	2	14.1	0.1	1	177	64	52.8	12.3	34.01	8.43	8.47	249.8	1.69	4.16	1740
2-9	14.3	2	13.55	-0.75	1	170	55	50.3	11.27	35.53	8.37	8.4	230	1.7	4.47	2120
2-10	14.3	2	14.25	-0.05	1	165.5	51.4	49.99	11.05	33.9	8.2	8.2	223	1.71	4.4	2160
2-11	14.9	2	14.32	-0.58	1	177	57.9	53.1	11.1	32.43	8.17	8.21	231	1.71	4.42	2180
2-12	14.3	2	14.15	-0.15	1	176	55.1	82.1	12.84	38	8.85	8.9	240.3	1.71	4.25	1700
2-13	14	2	14.5	0.5	1	174.7	61.8	50.1	13.05	35.01	8.92	8.95	227.1	1.72	4.29	1980
2-14	14	2	14.8	0.8	1	175	62	48.41	13.96	34.78	8.89	8.91	227.4	1.73	4.31	1960
2-15	14.9	2	14.4	-0.5	1	172	60	49.4	11.98	35.79	9.17	9.19	205.2	1.81	4.69	1980
2-16	14.9	2	14	-0.9	1	169.3	53.8	50.1	10.56	33.9	8.37	8.41	209.4	1.85	4.45	2160
2-17	14.9	2	14.4	-0.5	1	172	59.3	47.7	12.03	35.77	9.09	9.1	208.1	1.85	4.71	1980
2-18	14.9	2	14	-0.9	1	169.1	54	50.2	10.62	34.01	8.4	8.41	210	1.89	4.46	2180
2-19	14.9	2	14.02	-0.88	1	168.2	56	49.99	11.78	33.02	8.28	8.4	220.2	1.9	4.7	2180
2-20	14.9	2	14.02	-0.88	1	167.8	55.8	49.8	11.82	33.13	8.37	8.38	219.7	1.95	4.75	2200
2-21	14.4	2	13.82	-0.58	1	169	56.7	47	11.88	34.49	7.58	7.63	233.5	1.98	4.68	2180
2-22	14.4	2	13.82	-0.58	1	169	56.7	50	12.2	34.49	7.6	7.61	232.9	2.02	4.71	2180
2-23	14.3	2	13.93	-0.37	1	171.9	56.1	49.99	14.46	36.44	8.07	8.1	224	2.06	4.96	2180
2-24	14.3	2	13.93	-0.37	1	171.7	55.5	48	13.89	36.39	8.12	8.08	222.8	2.07	4.95	2160
2-25	14.9	2	14.5	-0.4	1	178	58.5	49.99	10.32	38.01	8.51	8.5	213.5	2.09	5.01	2020
2-26	14.6	2	13.9	-0.7	1	180	64.1	56.2	12.03	34.59	8.29	8.34	225.7	2.1	4.86	2100
2-27	14.6	2	13.78	-0.82	1	180	63.5	55.1	11.65	34.65	8.37	8.41	226	2.11	4.85	2100
2-28	14.9	2	14.8	-0.1	1	157	44.5	42.2	11.02	34.13	8.13	8.1	216	2.13	4.89	2160
2-29	14	2	14.2	0.2	1	170.2	50.3	50	10.23	36.64	9.06	9.09	204	2.17	5.09	1760
2-30	14.1	2	14.1	0	1	170	50	49.99	11.01	36.6	9.16	9.1	204.2	2.21	5.1	1960
2-31	14.9	2	14.5	-0.4	1	178	58.5	48.8	10.28	38.43	8.47	8.48	213	2.29	5.2	1900
2-32	14.1	2	13	-1.1	2	166	45	55.2	11.98	34.48	8.47	8.49	216.8	1.69	4.42	2100
2-33	14.1	2	12.4	-1.7	2	157.9	45.3	49.7	12.96	35.52	7.71	7.8	214.2	1.71	4.51	1920
2-34	13.9	2	11.6	-2.3	2	160	45.4	52.4	10.99	36.98	9.15	9.2	185.9	1.72	4.55	1940
2-35	14.1	2	12.8	-1.3	2	166	52.2	55	12	34.46	8.49	8.51	217.1	1.72	4.44	1900
2-36	14.1	2	11.9	-2.2	2	159.8	45	52.2	11.89	37.11	9.2	9.2	186.8	1.74	4.57	2140
2-37	14.1	2	12.38	-1.72	2	157	45.2	41.7	8.96	34.56	7.77	7.79	214.5	1.77	4.54	2020
2-38	14.3	2	12.75	-1.55	2	170.1	52.3	49.1	12.01	37.98	10.2	9.8	198.5	1.78	4.84	2060
2-39	14.3	2	12.75	-1.55	2	170.6	55	47.6	11.82	38.94	9.77	9.8	197	1.84	4.89	1920
2-40	14.6	2	13.5	-1.1	2	165	50.4	49	11.1	38.01	9.01	9.04	194.6	1.89	4.88	1780
2-41	14.2	2	13.07	-1.13	2	165	46.2	50.2	10.01	37.88	8.91	8.93	195.2	1.93	4.91	2060
2-42	14.7	2	13.37	-1.33	2	180	60	48.1	9.95	38.35	8.97	9	224	2.05	4.91	1840
2-43	14.7	2	13.37	-1.33	2	168	65.1	48.1	9.95	38.35	8.97	9	224	2.05	4.91	1840
2-44	14.3	2	13.25	-1.05	2	162.9	50.8	49	11.02	33.01	8.12	8.09	218.9	2.08	4.93	2160
2-45	14.4	2	13.25	-1.15	2	163	50.9	49.2	10.77	32.84	8.07	8.1	219.2	2.1	4.94	2180
2-46	14.9	2	13.8	-1.1	2	157.2	43.9	42	10.83	34.03	8.07	8.09	216.3	2.13	4.89	2180
2-47	14.6	2	15.68	1.08	3	178	64.8	55.9	12.5	32.01	8.02	7.97	253.6	1.5	3.97	2020
2-48	14.6	2	15.68	1.08	3	182.6	69.8	55.9	12.48	31.11	7.67	7.71	254	1.53	3.99	2000
2-49	14.3	2	15.55	1.25	3	176	62.4	52.01	11.03	34.07	8.1	8.01	233.8	1.66	4.36	2020
2-50	14.3	2	15.75	1.45	3	172.5	62.4	51	10.88	33.72	7.92	7.96	233	1.68	4.4	2000
2-51	14.7	2	16.07	1.37	3	172.5	55.2	52.4	11.02	35.23	8.5	8.5	222.2	1.7	4.38	2180
2-52	14.7	2	15.97	1.27	3	172	55	52.1	10.88	35.47	8.38	8.42	221	1.74	4.41	2160
2-53	14.9	2	16.02	1.12	3	181.2	67.1	55.3	11.38	33.68	8.51	8.54	225.1	1.78	4.48	2060
2-54	14.9	2	15.96	1.06	3	181	65.1	56	11.38	33.75	8.47	8.51	224	1.82	4.52	2060
2-55	14.3	2	15.8	1.5	3	174.5	62.5	55	12.98	34.89	8.23	8.3	232.3	1.98	4.69	2020
2-56	14.3	2	15.6	1.3	3	174	62.1	54.8	13.52	35.67	8.27	8.31	232	2	4.73	2000
3-1	15.8	3	15.23	-0.57	1	186.6	68.8	51	11.02	31.3	8.26	8.29	237	1.58	4.03	2180
3-2	15.8	3	15.5	-0.3	1	187	69	21.6	10.83	31.3	8.16	8.28	237.5	1.6	4.05	2160
3-3	15.3	3	15.5	0.2	1	178.5	59.7	49	11.54	33.06	8.3	8.32	219	1.72	4.46	2140
3-4	15.3	3	15.5	0.2	1	178.5	60.5	50.1	12.4	34.02	8.25	8.3	220.1	1.7	4.45	1660
3-5	15.8	3	15.9	0.1	1	186	70	53.1	11.51	33.18	8.18	8.21	227.9	1.98	4.45	2160
3-6	15.8	3	15.53	-0.27	1	185.9	69.4	52.8	11.27	33.2	8.19	8.23	227	2.01	4.48	1900
3-7	15.5	3	15.4	-0.1	1	172.5	61.7	52.4	10.5	33.21	8.32	8.33	247	1.97	4.6	1980
3-8	15.5	3	15.4	-0.1	1	172.5	62.3	51.8	11.01	33.45	8.32	8.4	246.8	1.86	4.53	2000
3-9	15.8	3	15.73	-0.07	1	172.9	64.2	54.6	12.64	33.25	9.08	9.09	233.1	1.74	4.61	2040
3-10	15.8	3	15.85	0.05	1	173.1	64.3	55.1	12.32	33.3	9.08	9.11	233.4	1.71	4.58	2180
3-11	15.9	3	16.4	0.5	1	172.2	58.8	48.7	12.13	33.43	8.1	8.1	225.7	1.86	4.56	2160
3-12	15.2	3	15.27	0.07	1	170	55.9	46	12.26	33.45	8.88	8.92	248	1.78	4.37	2180
3-13	15.5	3	15.5	0	1	175.86	61.54	52.8	10.83	33.46	7.88	7.89	246	1.97	4.47	1980
3-14	15.4	3	15.42	0.02	1	175.5	67.2	52	15.34	33.55	8.78	8.8	247	1.63	4.25	2020
3-15	15.4	3	15.42	0.02	1	175.6	67.5	51.8	14.84	34.05	9.02	8.9	245.8	1.7	4.3	2120
3-16	15.8	3	16.25	0.45	1	172	61.2	58	11.3	33.89	8.19	8.27	260.1	1.6	4.12	2160
3-17	15.8	3	16.4	0.6	1	168.2	56.4	51.5	11.98	33.91	8.21	8.2	228.3	2.04	4.71	2160
3-18	15.2	3	15.35	0.15	1	170.5	56.3	48.5	13	34.01	9.02	8.99	246.9	1.75	4.35	1840
3-19	15.8	3	16.23	0.43	1	166.9	53.4	51.5	12.09	34.12	8.18	8.2	227.7	2.04	4.69	2180
3-20	15.8	3	16.5	0.7	1	170.4	55.4	55.3	12.98	34.28	8.01	8.03	253.6	1.7	4.21	2000
3-21	15.8	3	16.05	0.25	1	170.7	55	55.3	13.19	34.31	7.98	7.99	254	1.61	4.14	2120
3-22	15.8	3	16.25	0.45	1	172	60	57.9	11.27	34.47	8.28	8.3	258.1	1.62	4.16	1960
3-23	15.7	3	16.17	0.47	1	180	57	58	12.26	34.59	8.32	8.34	252	1.98	4.52	2180
3-24	15.3	3	15.5	0.2	1	176	60	57.2	11.43	34.71	8.04	8.06	242	2.05	4.67	1700
3-25	15	3	15.5	0.5	1	176	59.2	57.1	12.01	34.98	8.45	8.5	246.9	2.06	4.87	2180
3-26	15.3	3	15.5	0.2	1	176	59.8	56.9	12.37	35.02	8.1	7.12	240.9	1.99	4.63	2180
3-27	15	3	15.3	0.3	1	176	58	56.6	11.76	35.06	8.48	8.5	247	2.07	4.87	1740
3-28	15.8	3	15.23	-0.57	1	168.1	54.1	52.8	12.42	36.01	8.31	8.2	248.7	1.98	3.99	1540
3-29	15.8	3	15.23	-0.57	1	167.8	53	53.2	12.31	35.76	8.17	8.2	249	2.07	4.03	2140
3-30	15.3	3	15.6	0.3	1	178	64.8	60.1	15.2	36.68	8.8	8.81	220.1	1.98	4.69	2000
3-31	15.3	3	15.4	0.1	1	178	65	59.5	18.63	37.62	8.75	8.77	220	2.08	4.78	2160
3-32	15.8	3	14.55	-1.25	2	176	58.1	51	11.38	33.75	8.02	8.06	215.1	2.01	4.71	2000
3-33	15.8	3	14.55	-1.25	2	176	57.6	50.7	11.43	33.78	7.98	8.01	214	2.16	4.78	2020
3-34	15	3	13.6	-1.4	2	165.6	56.9	49.2	9.24	34.24	8.08	8.1	214.5	1.79	4.58	2000
3-35	15.3	3	13.4	-1.9	2	168	55	49.4	9.46	34.32	8.54	8.57	214.1	1.94	4.53	1980
3-36	15.3	3	13.5	-1.8	2	167.9	54.6	49.6	10.41	34.32	8.68	8.57	214.4	2.01	4.63	2000
3-37	15.1	3	14	-1.1	2	172	58.2	54.2	13.63	35.68	8.6	8.61	216.8	1.58	4.3	1980
3-38	15.1	3	13.9	-1.2	2	172	55	54.2	13.63	35.82	8.58	8.6	217	1.62	4.32	2020
3-39	14.6	3	12.7	-1.9	2	160.1	45.2	48.6	10.31	35.86	9.46	9.46	207.1	1.84	4.79	2180
3-40	14.8	3	12.7	-2.1	2	160	45	48.6	12.12	35.95	9.5	9.5	205.9	1.9	4.99	1860
3-41	15	3	13.9	-1.1	2	163.9	55.8	48.5	12.02	36.21	9.02	9.1	213.2	1.81	4.6	2020
3-42	15.8	3	16.93	1.13	3	172.5	63.8	50	12.7	32.01	7.74	7.76	246.3	1.6	4.28	2140
3-43	15.8	3	16.92	1.12	3	172.5	64	50.1	13.2	32.01	8.04	8.06	245	1.64	4.3	2160
3-44	15.8	3	17.03	1.23	3	186.5	75	56.9	11.32	32.62	7.58	7.6	253	1.92	4.58	1840
3-45	15.8	3	17.03	1.23	3	186.4	74.8	57.3	11.4	32.6	7.62	7.59	254.4	1.89	4.5	2160
3-46	15.9	3	17.1	1.2	3	172.4	60.1	50.1	11.76	33.4	8.08	8.1	226	1.9	4.59	2160
3-47	15.9	3	17.12	1.22	3	178	65.4	54.6	14.02	33.64	8.37	8.39	242	1.54	4.14	2160
3-48	15.8	3	17.13	1.33	3	182	65	56.8	12.04	33.89	7.88	7.9	201	1.88	4.46	2080
3-49	15.9	3	18.12	2.22	3	177	60	55.2	14.51	33.99	8.48	8.5	236	1.55	4.13	2160
3-50	15.3	3	17.4	2.1	3	170	60	51.5	10.34	34.28	8.08	8.11	232	2	4.73	1980
3-51	15.9	3	17.42	1.52	3	175	60	55.9	13.52	34.54	8.13	8.15	232	1.97	4.49	2160
3-52	15.9	3	16.96	1.06	3	177	60	56.7	11.1	35.63	8.39	8.41	229	2.01	4.5	2160
